# Supplementary material
Source: publisher figshare collection journal article supplement (https://acs.figshare.com/ndownloader/files/27462216)

# Supporting information

Screening of Fv-antibodies with specific binding activities to monosodium urate and calcium pyrophosphate dihydrate crystals for the diagnosis of gout and pseudo-gout

Jaeyong Jung<sup>a,#</sup>, Ji-Hong Bong<sup>a,#</sup>, Soo Jeong Lee<sup>a</sup>, Moon-Ju Kim<sup>a</sup>, Jeong Soo Sung<sup>a</sup>, Misu Lee<sup>b</sup>, Min-Jung Kang<sup>c</sup>, Jungsik Song<sup>d</sup>, Joachim Jose<sup>e,\*</sup>, Jae-Chul Pyun<sup>a,\*</sup>

<sup>a</sup> Department of Materials Science and Engineering, Yonsei University, 50 Yonsei-Ro, Seodaemun-Gu, Seoul (03722), Korea.

<sup>b</sup> Division of Life Sciences, College of Life Science and Bioengineering, Incheon National University, Incheon (22012), Korea

<sup>c</sup> Korea Institute of Science and Technology (KIST), Seoul (02792), Korea

<sup>d</sup> Division of Rheumatology, Department of Internal Medicine, Yonsei University College of Medicine, Seoul (03722), Korea

<sup>e</sup> Institute of Pharmaceutical and Medical Chemistry, PharmaCampus, Westphalian Wilhelms-University Münster, Corrensstr. 48, Münster (48149), Germany.

#These authors contributed equally to this work.

\*Correspondence:

Prof. Jae-Chul Pyun

Tel: +82 2 2293 5509; Fax: +82 2 312 5375; E-mail: [jcpyun@yonsei.ac.kr](mailto:jcpyun@yonsei.ac.kr)

Prof. Joachim Jose

Tel: +49 251 8332 200; Fax: +49 251 8332 211; E-mail: [joachim.jose@uni-muenster.de](mailto:joachim.jose@uni-muenster.de)

Figure S1. Binding affinity of five synthetic peptides to (a) MSU, (b) CPPD (Fig. 4) and hydroxyapatite crystal as a model of (c) BCP. (d) Comparison of binding affinity of five synthetic peptides to three kinds of crystals of MSU, CPPD and hydroxyapatite crystals.

(a)

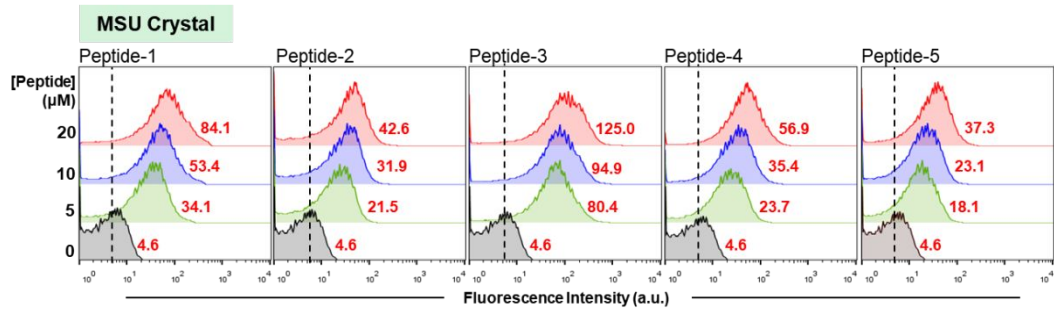

(b)

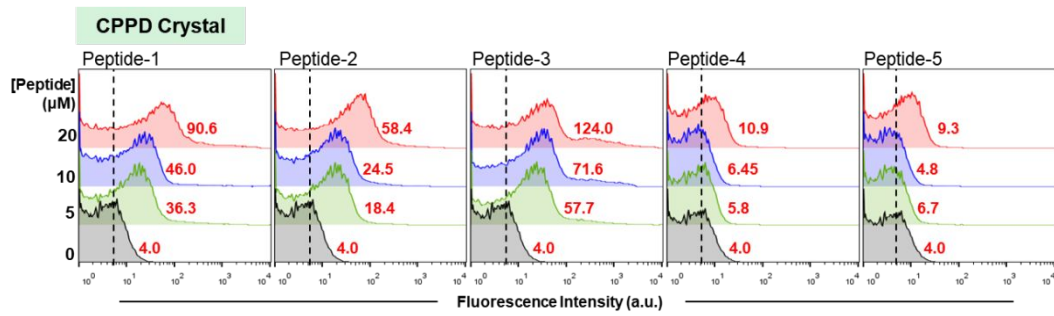

(c)

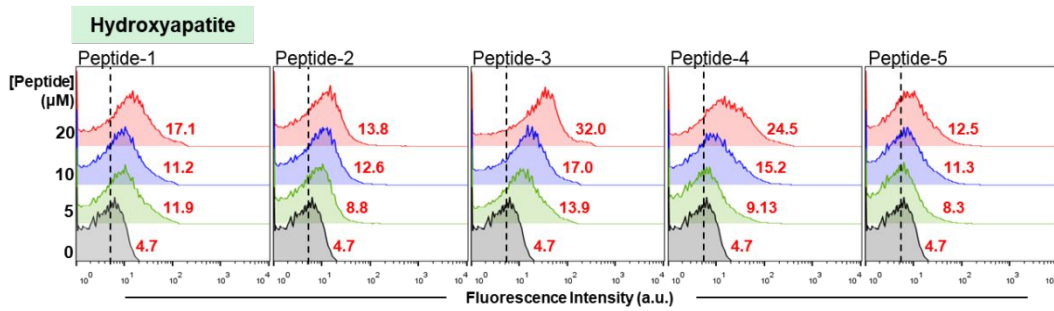

(d)

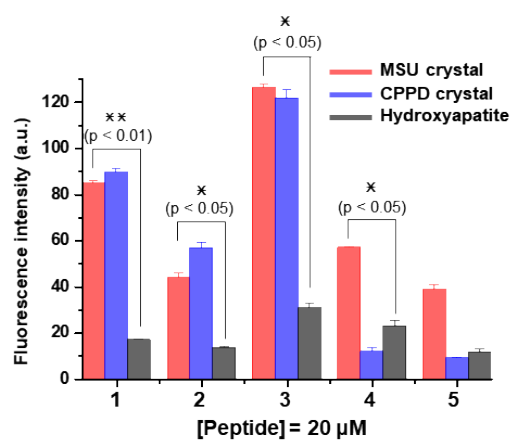

Figure S2. Hydropathy analysis of the five synthetic peptides.

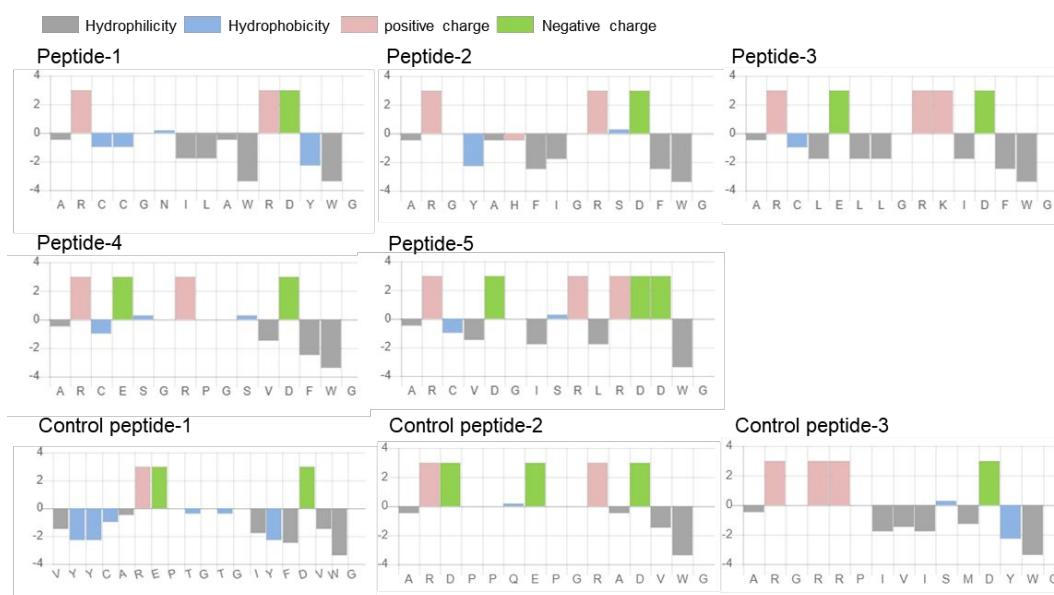

Figure S3. Comparison of the binding affinity of three kinds of control peptides to MSU and CPPD crystals using flow cytometry. The amino acid sequences of three kinds of control peptides were as follows: Control peptide-1 : <sup>1</sup>VYYCA <sup>6</sup>REPTG <sup>11</sup>TGIYF <sup>16</sup>DVWG, Control peptide-2 : <sup>1</sup>ARDPP <sup>6</sup>QEPGR <sup>11</sup>ADVWG, Control peptide-3 : <sup>1</sup>ARGRR <sup>6</sup>PIVIS <sup>11</sup>MDYWG.

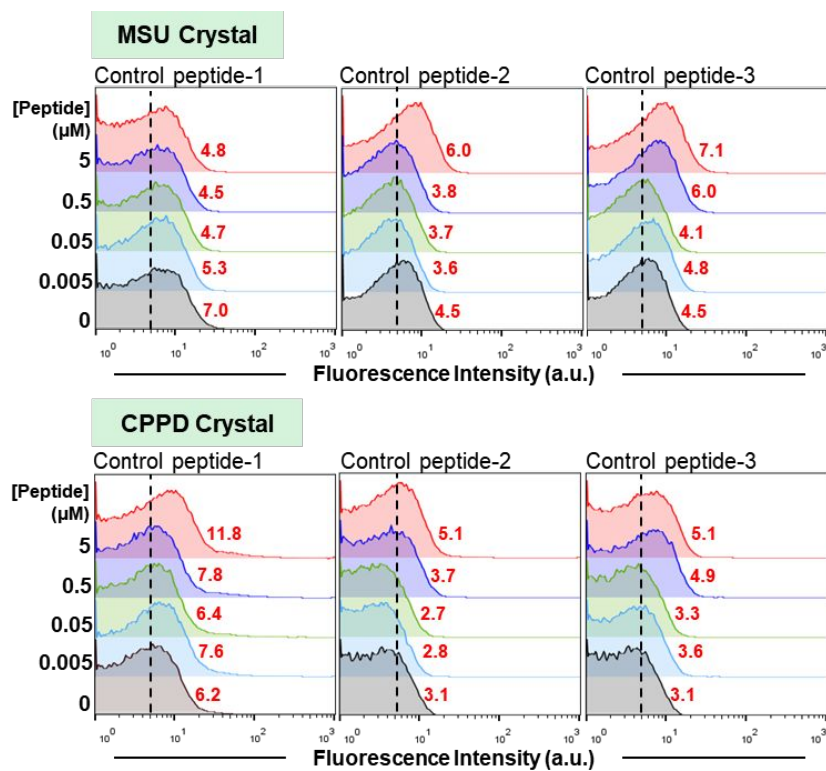

Figure S4. Chromogenic assay results before and after the proteinase K treatment to (a) MSU and (b) CPPD crystals.

(a)

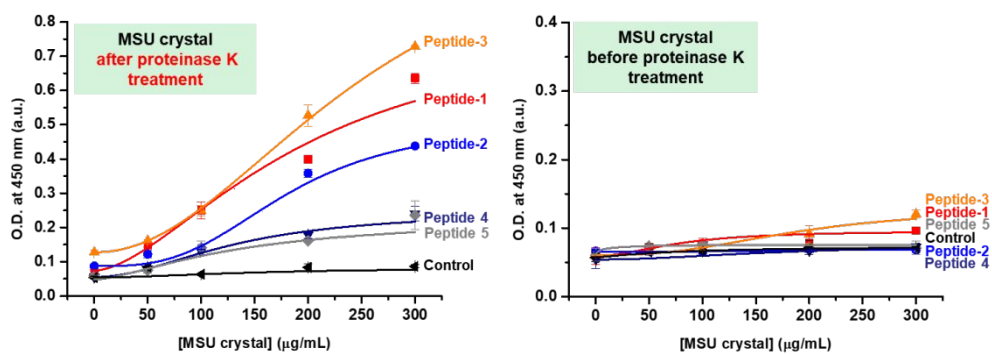

(b)

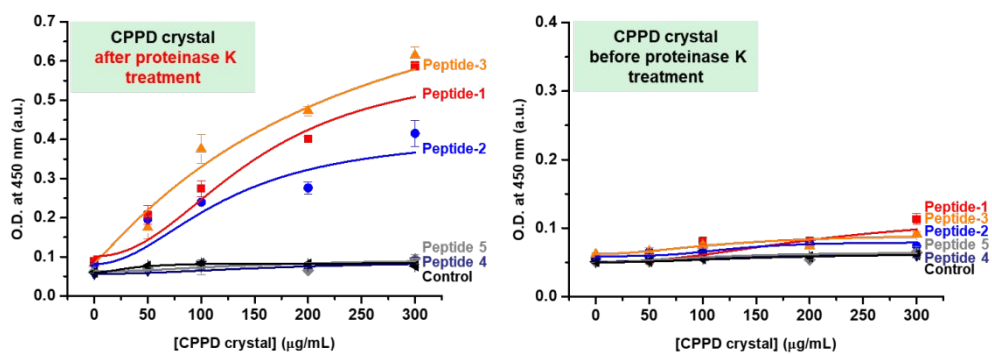

Supplement: Supplementary file 1 [file 27462216]
